# Supplementary material for: Modeling the Colchicum autumnale Tubulin and a Comparison of Its Interaction with Colchicine to Human Tubulin
Source: Int J Mol Sci. 2017 Aug 2;18(8):1676. doi: 10.3390/ijms18081676 (PMC5578066; doi:10.3390/ijms18081676)
Supplement: Supplementary file 1 [file ijms-18-01676-s001.pdf]

# Modeling the *Colchicum autumnale* tubulin and a comparison of its interaction with colchicine to human tubulin

Ivana Spasevska, Ahmed T. Ayoub, Philip Winter, Jordane Preto, Kane K.-S. Wong, Charles Dumontet and Jack A. Tuszynski

## Supporting information

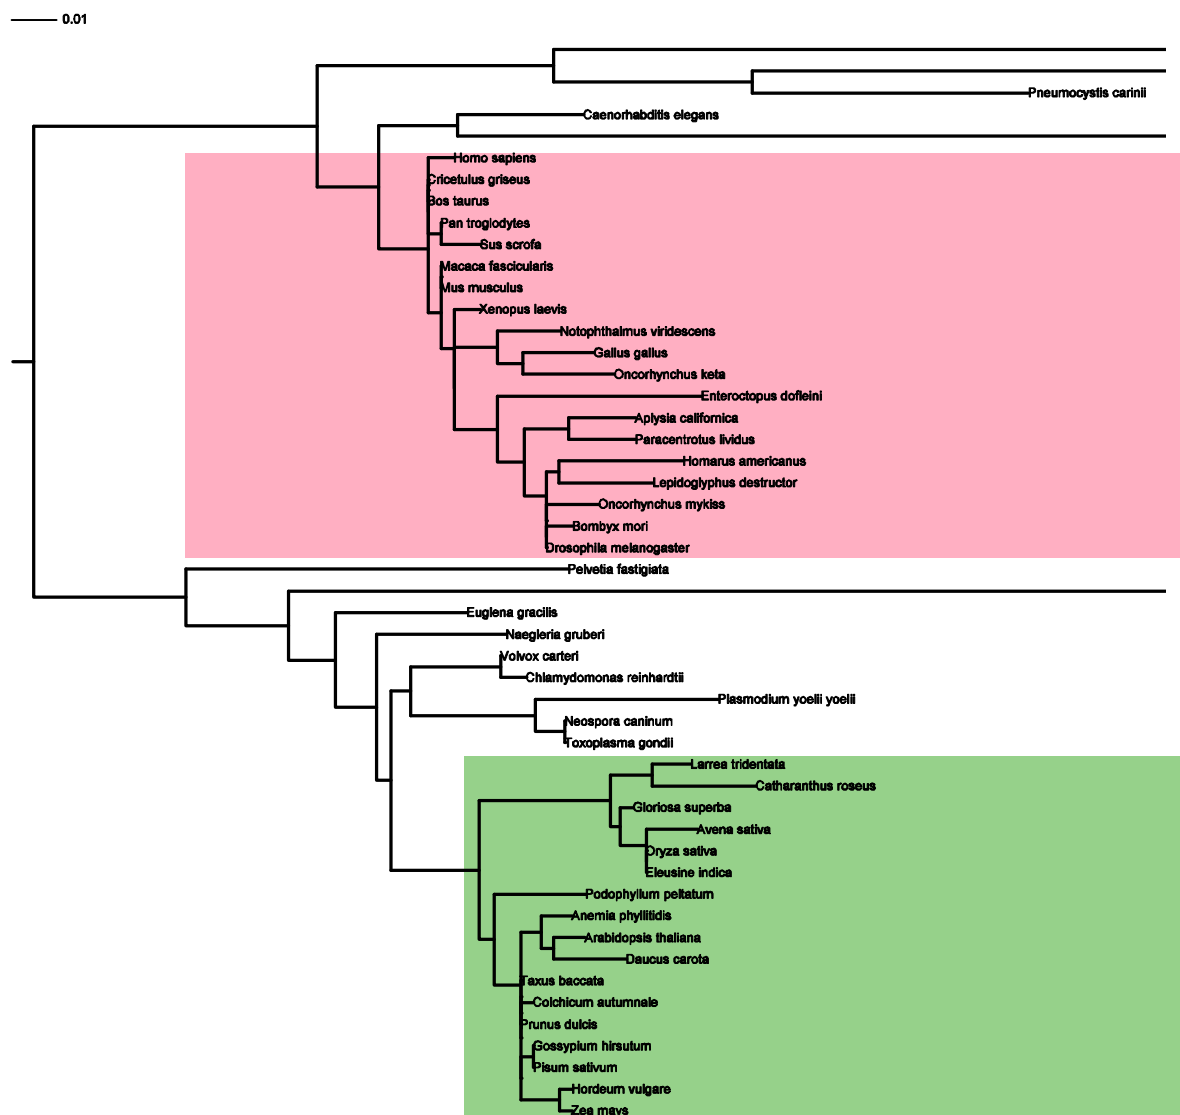

Figure S1. Phylogenetic tree of  $\alpha$ -tubulin. Animals and plants groups are highlighted.

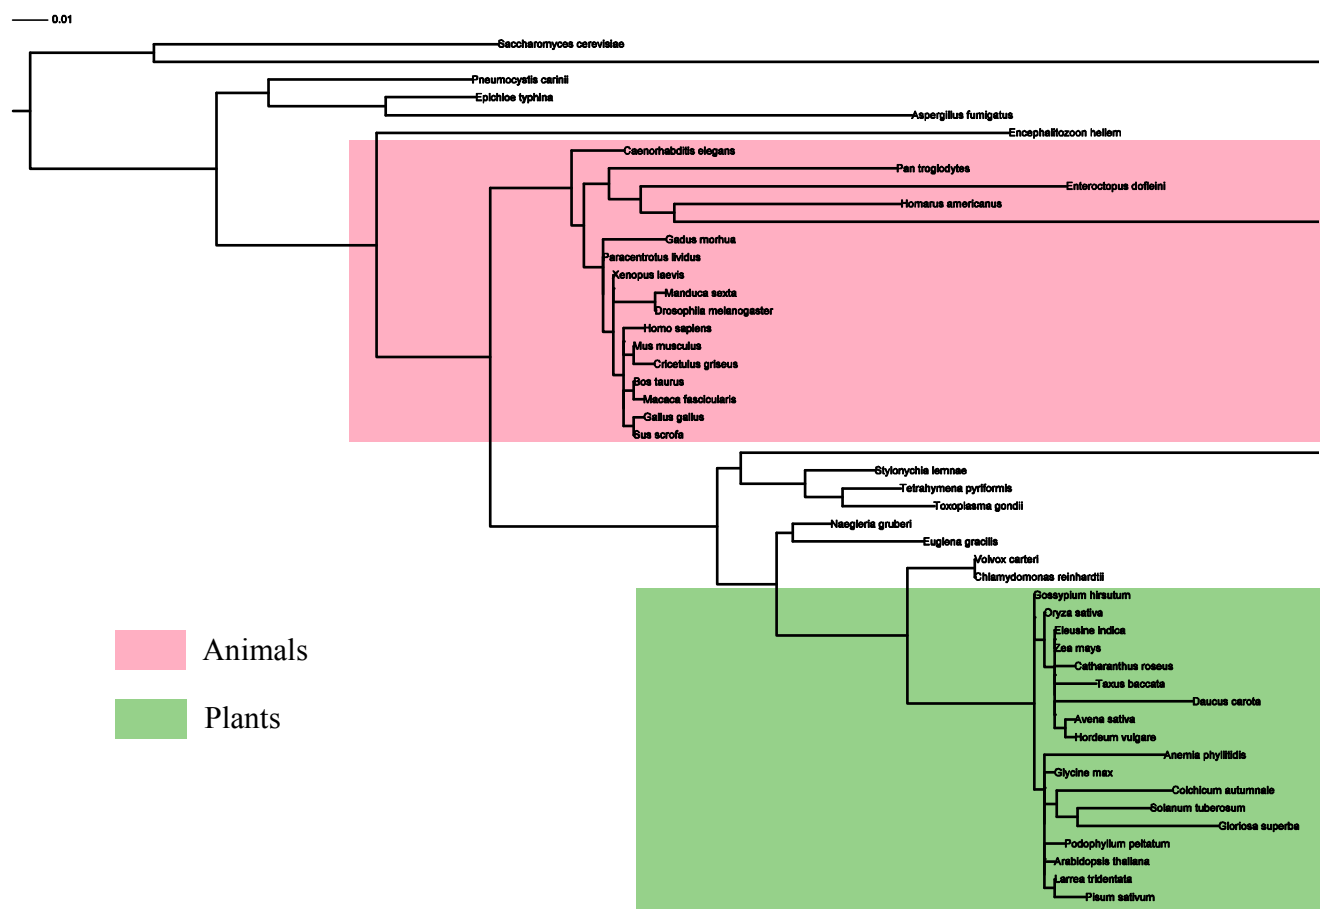

**Figure S2.** Phylogenetic tree of  $\beta$ -tubulin. Animals and plants groups are highlighted.

## Colchicine

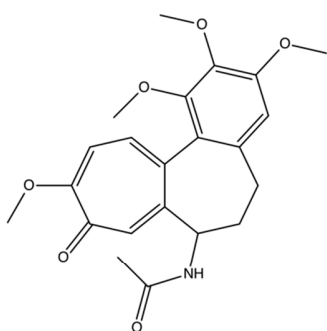

## Paclitaxel

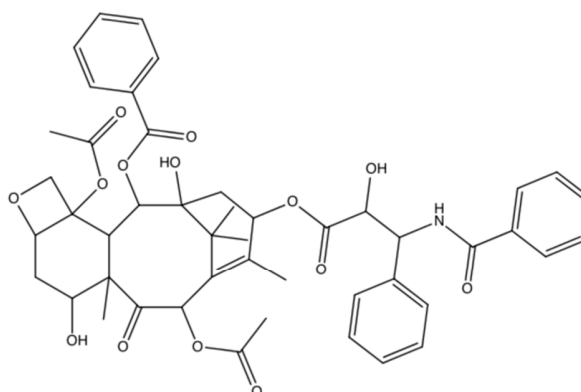

## Podophyllotoxin

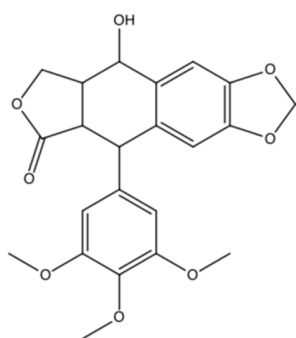

## Cornigerine

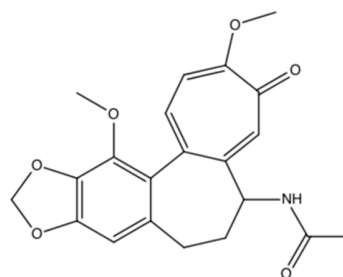

**Figure S3.** Comparison of colchicine and paclitaxel structures together with two other colchicine derivatives, i.e., podophyllotoxin and cornigerine.
